# Supplementary material for: Identification of key genes involved in the phenotypic alterations of res (restored cell structure by salinity) tomato mutant and its recovery induced by salt stress through transcriptomic analysis
Source: BMC Plant Biol. 2018 Oct 1;18:213. doi: 10.1186/s12870-018-1436-9 (PMC6167845; doi:10.1186/s12870-018-1436-9)
Supplement: Supplementary file 12 — Table S1. List of primers used for quantitative real-time RT-PCR. (XLSX 12 kb) [file 12870_2018_1436_MOESM12_ESM.xlsx]

## Sheet: Table S1
	Table S1 (Excel file). List of primers used for quantitative real-time RT-PCR.
	Gene annotation	Transcript ID	Primer sequence (5'-3')	Efficiency (%)
	RCA1	Solyc09g011080.2.1	Forward: AGAACTTGAGGCTGGTTGCT	99
			Reverse: GTTGATCATCGGACACATCGTT
	AOX1A	Solyc08g075540.2.1	Forward: GGAGCAACAAGGATGACACGA	87
			Reverse: CAGCGACTCCACCAACAACT
	GIGANTEA1	Solyc04g071990.2.1	Forward: CATTGCTCGAGTGCAAACAC	90
			Reverse: AACTTGCGATCCCTTTACCA
	WRKY39	Solyc03g116890.2.1	Forward: GTGAAAATGGGATGGGCTAA	88
			Reverse: TAATTTCAAGGGCCACCAAA
	MYB14	Solyc06g083900.2.1	Forward: CAGCTCCAAGTTCCAAGTGA	90
			Reverse: TGCTCCATGGACCTCTTTTC
	MPI	Solyc07g007250.2.1	Forward: GCACAAGATGCAACTCTGACG	90
			Reverse: CCTGACAGAACGTACCACCA
	AOS	Solyc04g079730.1.1	Forward: CGAACTCTCCACGAAAGGTA	109
			Reverse: TTCCAAGTTCGGTGTCTTGA
	JAZ1	Solyc12g009220.1.1	Forward: ACCTGATCAACCAGAGAAGGC	120
			Reverse: GTGGGGTTCTGTTTGTTGGC
	Ca2+-ATPase	Solyc09g082870.1.1	Forward: CTATTGACGGGCCTGGAAC	90
			Reverse: GGTACGATGCTTGTCCCAAT
	GA20OX-2	Solyc06g066830.2.1	Forward: GGAGAGTTTAGGGGTCGAAA	99
			Reverse: TAGTTTCACTGCTTTGGGGT
	Expansin	Solyc12g089380.1.1	Forward: CTCAACCAGCTTGGGAAAAA	96
			Reverse: CTGATTCAACAGATCCTGCC
	Extensin	Solyc02g030220.1.1	Forward: ACTATGAGCAATCGCCTACA	80
			Reverse: GAGGTGAAGCATAGGTGACA
	ns-LTP	Solyc09g082280.2.1	Forward: CATGGCTTCCTACGTTTTCA	83
			Reverse: CAACACACACCCAACAAAC
	Guanylate-binding protein 1	Solyc05g041770.1.1	Forward: GCTTGACTGCCTCACTGAAAT	99
			Reverse: GGTACGATGCTTGTCCCAAT
